# Supplementary material for: Social Determinants of Antenatal Care Utilization Among Reproductive Age Women: An Analysis of 2022 Ghana Demographic and Health Survey
Source: Research Square preprint supplement (doi:10.21203/rs.3.rs-5245471/v1), 2025-10-24
Supplement: Supplementary file 1 [file 80414bc74de5d2235d8829aa.docx]

| **Table 1.** Study variable description | |  |
| --- | --- | --- |
| Variable name | Description | Level of measurement |
| Antenatal care use | Respondents use of antenatal care | 0 = Did not use antenatal care |
|  |  | 1 = Used antenatal care |
| Age | Maternal age (years) | 1 = 15 to 24 |
|  |  | 2 = 25 to 34 |
|  |  | 3 = 35 to 49 |
| Education | Highest educational level | 1 = None |
|  |  | 2 = Primary |
|  |  | 3 = Secondary |
|  |  | 4 = High |
| Marital Status | Current relationship status | 1 = Never in union |
|  |  | 2 = Married |
|  |  | 3 = Living with partner |
|  |  | 4 = Widowed |
|  |  | 5 = Divorced |
|  |  | 6 = No longer living together/separated |
| Religion | Religious affiliation of the respondent | 1 = Christianity |
|  |  | 2 = Islam |
|  |  | 3 = Traditional/Other |
| Household Wealth Quintile | Financial status of the respondent | 1 = Poorest |
|  |  | 2 = Poorer |
|  |  | 3 = Middle |
|  |  | 4 = Richer |
|  |  | 5 = Richest |
| Residence | Place of residence | 1 = Urban |
|  |  | 2 = Rural |
| Childbirth Type | Type of birth | 1 = Single birth |
|  |  | 2 = 1st twins of multiple |
|  |  | 3 = 2nd twins of multiple |
|  |  | 4 = 3rd twins of multiple |
| Health Status | Current health status of respondent | 1 = Very good |
|  |  | 2 = Good |
|  |  | 3 = Moderate |
|  |  | 4 = Bad |
|  |  | 5 = Very bad |

| **Table 2.** Distribution of antenatal care use by social determinants (*N*=5,218) | | |  |  |  |
| --- | --- | --- | --- | --- | --- |
| Predictors |  | Sample Size for Specific Group | Did Not Use Antenatal Care | Used Antenatal Care | P-Value |
| Total Sample Size |  |  |  |  |  |
|  | Women |  | 653 [12.5%] | 4,565 [87.5%] |  |
| Age |  | 5218 [100.0%] |  |  |  |
|  | 15 to 24 | 1388 [26.6%] | 226 [16.3%] | 1162 [83.7%] | <0.0001* |
|  | 25 to 34 | 2490 [47.72%] | 254 [10.2%] | 2,236 [89.8%] |  |
|  | 35 to 49 | 1340 [25.68%] | 173 [12.9%] | 1,167 [87.1%] |  |
| Education |  |  |  |  |  |
|  | None | 1528 [29.28%] | 288 [18.8%] | 1,240 [81.2%] | <0.0001* |
|  | Primary | 834 [15.98%] | 131 [15.7%] | 703 [84.3%] |  |
|  | Secondary | 2456 [47.07%] | 228 [9.3%] | 2,228 [90.7%] |  |
|  | Higher | 400 [7.67%] | 6 [1.5%] | 394 [98.5%] |  |
| Marital Status |  |  |  |  |  |
|  | Never in union | 514 [9.85%] | 84 [16.3%] | 430 [83.7%] | <0.001 |
|  | Married | 3541 [67.86%] | 393 [11.1%] | 3,148 [88.9%] |  |
|  | Living with partner | 942 [18.05%] | 140 [14.9%] | 802 [85.1%] |  |
|  | Widowed | 48 [0.92%] | 6 [12.5%] | 42 [87.5%] |  |
|  | Divorced | 30 [0.57%] | 6 [20.0%] | 24 [80.0%] |  |
|  | No longer living together/separated | 143 [2.74%] | 24 [16.8%] | 119 [83.2%] |  |
| Religion |  |  |  |  |  |
|  | Christianity | 3261 [62.5%] | 368 [11.3%] | 2,893 [88.7%] | <0.0001* |
|  | Islam | 1682 [32.23%] | 195 [11.6%] | 1,487 [88.4%] |  |
|  | Traditional/Other | 275 [5.27%] | 90 [32.7%] | 185 [67.3%] |  |
| Household Wealth Quintile |  |  |  |  |  |
|  | Poorest | 1659 [31.79%] | 350 [21.1%} | 1,309 [78.9%] | <0.0001* |
|  | Poorer | 1294 [24.8%] | 159 [12.3%] | 1,135 [87.7%] |  |
|  | Middle | 947 [18.15%] | 91 [9.6%] | 856 [90.4%] |  |
|  | Richer | 748 [14.33%] | 40 [5.3%] | 708 [94.7%] |  |
|  | Richest | 570 [10.92%] | 13 [2.3%] | 557 [97.7%] |  |
| Residence |  |  |  |  |  |
|  | Urban | 2161 [41.41%] | 184 [8.5%] | 1,977 [91.5%] | <0.0001* |
|  | Rural | 3057 [58.59%] | 469 [15.3%] | 2,588 [84.7%] |  |
| Child Birth Type |  |  |  |  |  |
|  | Single birth | 5078 [97.32%] | 635 [12.5%] | 4,443 [87.5%] | 0.727 |
|  | 1st twins of multiple | 0 [0.0%] | 0 [0.0%] | 0 [0.0%] |  |
|  | 2nd twins of multiple | 136 [2.61%] | 18 [13.2%] | 118 [86.8%] |  |
|  | 3rd twins of multiple | 4 [0.08%] | 0 [0.0%] | 4 [100%] |  |
| Health Status |  |  |  |  |  |
|  | Very good | 1701 [32.6%] | 195 [11.5%] | 1,506 [88.5%] | 0.005 |
|  | Good | 2544 [48.75%] | 314 [12.3%] | 2,230 [87.7%] |  |
|  | Moderate | 796 [15.25%] | 107 [13.4%] | 689 [86.6%] |  |
|  | Bad | 156 [2.99%] | 31 [19.9%] | 125 [80.1%] |  |
|  | Very bad | 21 [0.4%] | 6 [28.6%] | 15 [71.4%] |  |

| **Table 3.** Unadjusted Odds ratio and 95% confidence interval of using antenatal care by socio-demographic risk factors in the bivariable logistic regression analyses | | | |
| --- | --- | --- | --- |
| Predictors |  | Unadjusted Odds Ratio (95% Confidence Interval) | P-Value |
| Age |  |  |  |
|  | 15 to 24 | Ref. | Ref. |
|  | 25 to 34 | 1.72 [1.42 - 2.08] | 0 |
|  | 35 to 49 | 1.31 [1.06, 1.63] | 0.013 |
| Education |  |  |  |
|  | None | Ref. | Ref. |
|  | Primary | 1.25 [0.99 - 1.56] | 0.056 |
|  | Secondary | 2.27 [1.88 - 2.74] | 0 |
|  | Higher | 15.25 [6.74 - 34.50] | 0 |
| Marital Status |  |  |  |
|  | Never in union | Ref. | Ref. |
|  | Married | 1.56 [1.21 - 2.02] | 0.001 |
|  | Living with partner | 1.12 [0.83 - 1.50] | 0.454 |
|  | Widowed | 1.37 [0.56 - 3.32] | 0.489 |
|  | Divorced | 0.78 [0.31 - 1.97] | 0.601 |
|  | No longer living together/separated | 0.97 [0.589 - 1.59] | 0.9 |
| Religion |  |  |  |
|  | Christianity | Ref. | Ref. |
|  | Islam | 0.97 [0.81 - 1.17] | 0.746 |
|  | Traditional/Other | 0.26 [0.20 - 0.34] | 0 |
| Household Wealth Quintile |  |  |  |
|  | Poorest | Ref. | Ref. |
|  | Poorer | 1.91 [1.56 - 2.34] | 0 |
|  | Middle | 2.52 [1.97 - 3.22] | 0 |
|  | Richer | 4.73 [3.37 - 6.65] | 0 |
|  | Richest | 11.46 [6.53 - 20.10] | 0 |
| Residence |  |  |  |
|  | Urban | Ref. | Ref. |
|  | Rural | 0.51 [0.43 - 0.62] | 0 |
| Child Birth Type |  |  |  |
|  | Single birth | Ref. | Ref. |
|  | 1st twins of multiple | N/A | N/A |
|  | 2nd twins of multiple | 0.94 [0.57 - 1.55] | 0.8 |
|  | 3rd twins of multiple | 7.00 [6.44 - 7.60] | 0 |
| Health Status |  |  |  |
|  | Very good | Ref. | Ref. |
|  | Good | 0.92 [0.76 - 1.11] | 0.388 |
|  | Moderate | 0.83 [0.65 - 1.07] | 0.158 |
|  | Bad | 0.52 [0.34 - 0.80] | 0.002 |
|  | Very bad | 0.32 [0.12 - 0.84] | 0 |

| **Table 4.** Adjusted Odds ratio and 95% confidence interval of using antenatal care by socio-demographic risk factors in the multivariate logistic regression analyses | | | |
| --- | --- | --- | --- |
| Predictors |  | Adjusted Odds Ratio (95% Confidence Interval) | P-Value |
| Age |  |  |  |
|  | 15 to 24 | Ref. | Ref. |
|  | 25 to 34 | 1.35 [1.09 - 1.67] | 0.006 |
|  | 35 to 49 | 1.19 [0.93 - 1.53] | 0.169 |
| Education |  |  |  |
|  | None | Ref. | Ref. |
|  | Primary | 1.23 [0.96 - 1.58] | 0.1 |
|  | Secondary | 1.80 [1.43 - 2.27] | 0 |
|  | Higher | 4.51 [1.89 - 10.78] | 0.001 |
| Marital Status |  |  |  |
|  | Never in union | Ref. | Ref. |
|  | Married | 1.97 [1.46 - 2.66] | 0 |
|  | Living with partner | 1.19 [0.87 - 1.63] | 0.27 |
|  | Widowed | 1.73 [0.68 - 4.45] | 0.251 |
|  | Divorced | 0.84 [0.32 - 2.21] | 0.725 |
|  | No longer living together/separated | 0.98 [0.58 - 1.64] | 0.937 |
| Religion |  |  |  |
|  | Christianity | Ref. | Ref. |
|  | Islam | 1.05 [0.85 - 1.30] | 0.62 |
|  | Traditional/Other | 0.43 [0.32 - 0.57] | 0 |
| Household Wealth Quintile |  |  |  |
|  | Poorest | Ref. | Ref. |
|  | Poorer | 1.81 [1.45 - 2.26] | 0 |
|  | Middle | 2.23 [1.66 - 3.00] | 0 |
|  | Richer | 3.61 [2.44 - 5.35] | 0 |
|  | Richest | 5.98 [3.20 - 11.17] | 0 |
| Residence |  |  |  |
|  | Urban | Ref. | Ref. |
|  | Rural | 1.15 [0.92 - 1.45] | 0.211 |
| Child Birth Type |  |  |  |
|  | Single birth | Ref. | Ref. |
|  | 1st twins of multiple | N/A | N/A |
|  | 2nd twins of multiple | 0.98 [0.58 - 1.65] | 0.938 |
|  | 3rd twins of multiple | 1 | N/A |
| Health Status |  |  |  |
|  | Very good | Ref. | Ref. |
|  | Good | 1.05 [0.86 - 1.28] | 0.65 |
|  | Moderate | 0.94 [0.72 - 1.22] | 0.623 |
|  | Bad | 0.82 [0.53 - 1.27] | 0.366 |
|  | Very bad | 0.50 [0.18 - 1.36] | 0.175 |
